# Supplementary material for: Blood immune transcriptome analysis of artificially fed dairy calves and naturally suckled beef calves from birth to 7 days of age
Source: PubMed Central journal article supplement (PMC6194081; doi:10.1038/s41598-018-33627-0), 2018-10-18
Supplement: 41598_2018_33627_MOESM1_ESM.pdf [file 41598_2018_33627_MOESM1_ESM.pdf]

# Supplementary Figures 1-13

**Blood immune transcriptome analysis of artificially fed dairy calves and naturally suckled beef calves from birth to 7 days of age**

C. Surlis<sup>1\*</sup>, B. Earley<sup>1</sup>, M. McGee<sup>1</sup>, K. Keogh<sup>1</sup>, P. Cormican<sup>1</sup>, G. Blackshields<sup>1</sup>, K. Tiernan<sup>1</sup>, A. Dunn<sup>2</sup>, S. Morrison<sup>2</sup>, A. Arguello<sup>1</sup>, S. M. Waters<sup>1</sup>

# Supplementary Figure 1

## Comparing Dairy 5% over time

D.05.048 V D.05.000

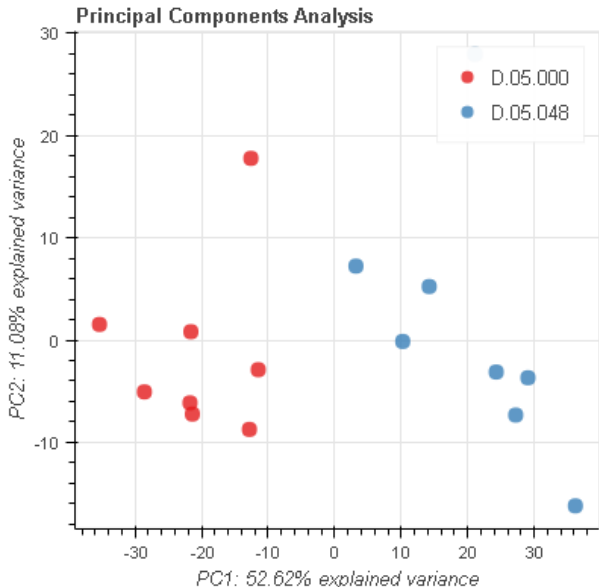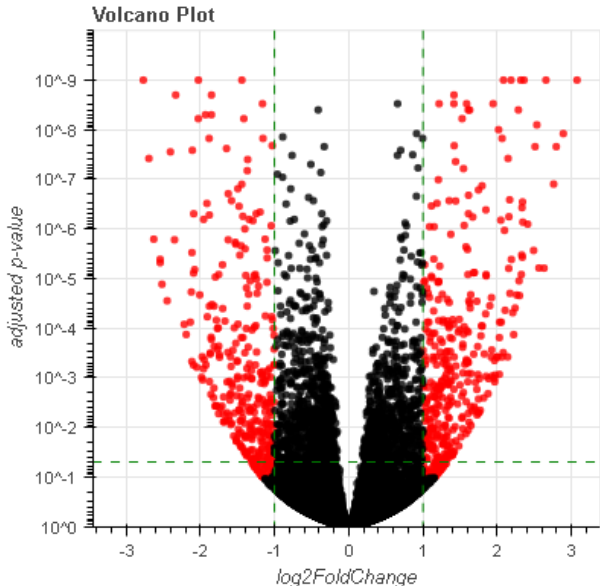

D.05.168 V D.05.072

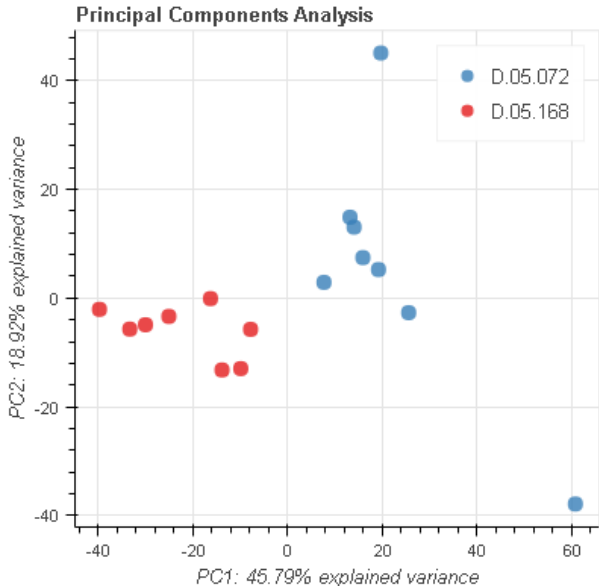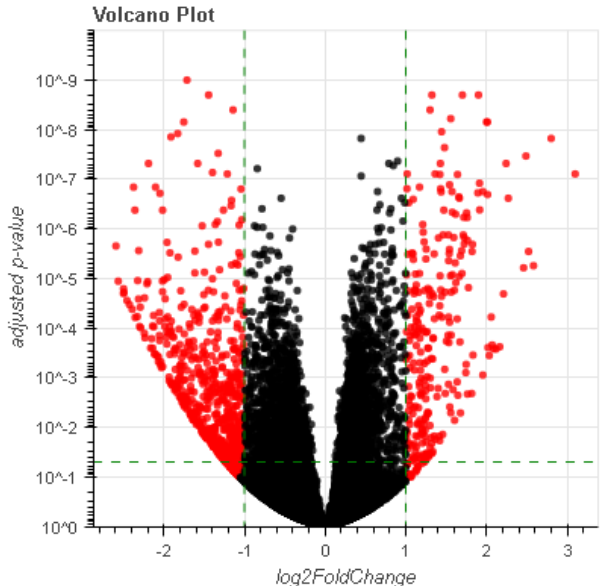

# Supplementary Figure 2

## Comparing Beef Breeds Beef LF V Beef CL across timepoints

**B.CL.048 V B.LF.048**

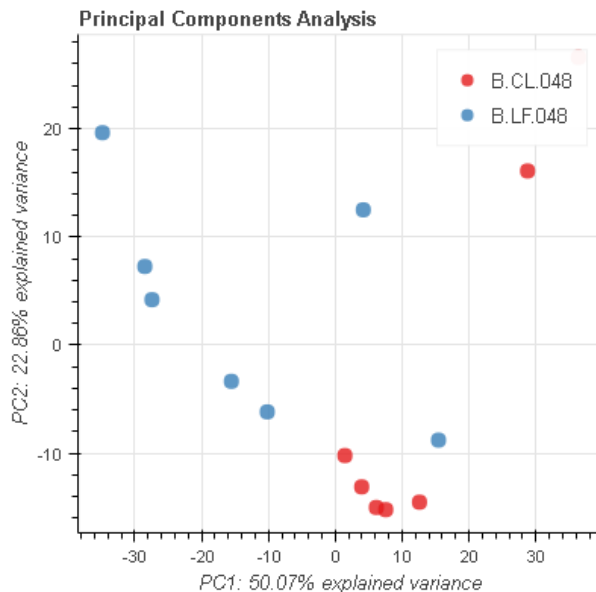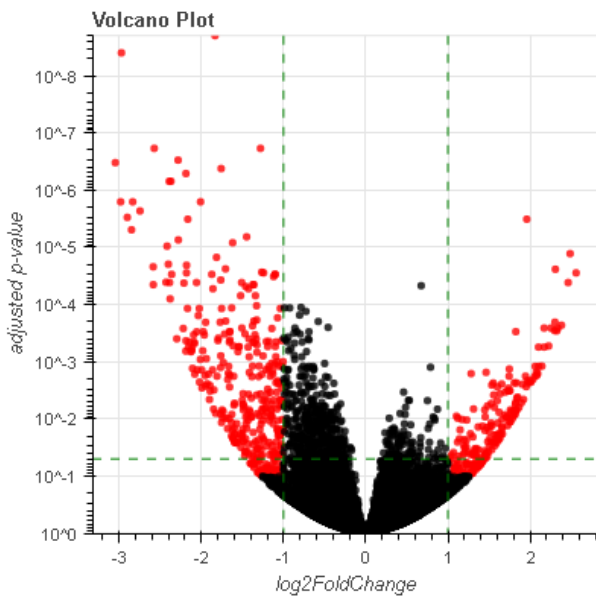

# Supplementary Figure 3

## Beef LF across time B.LF.048 V B.LF.000

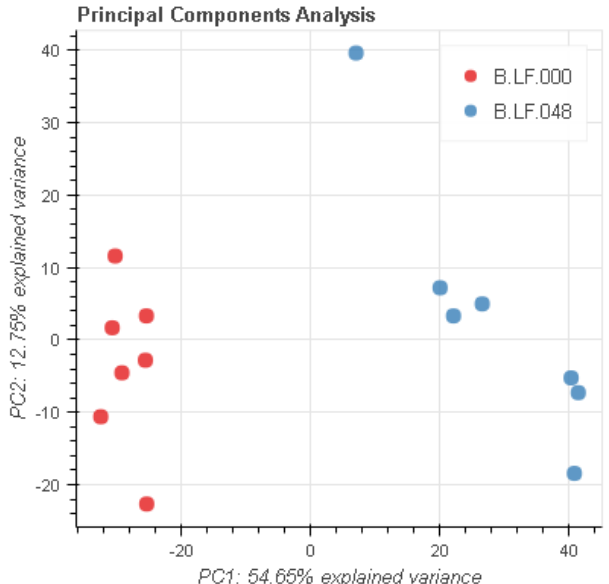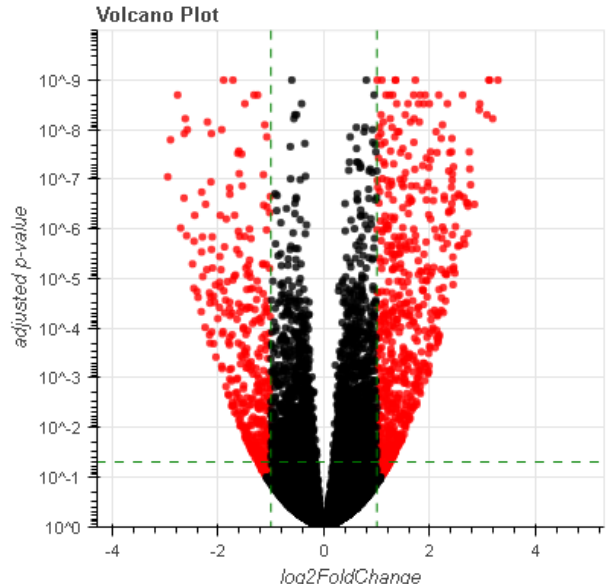

## B.LF.168 V B.LF.072

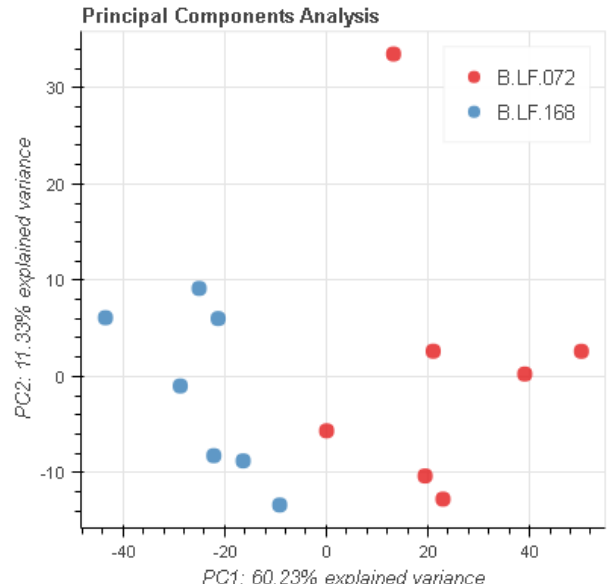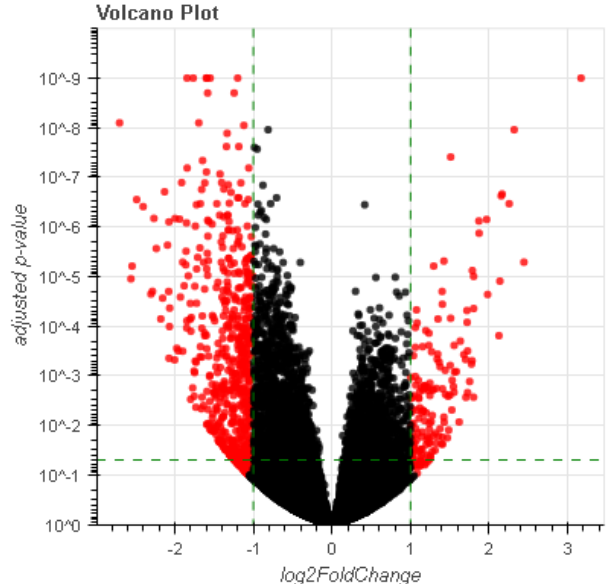

# Supplementary Figure 4

Beef CL across time  
B.CL.048 V B.CL.000

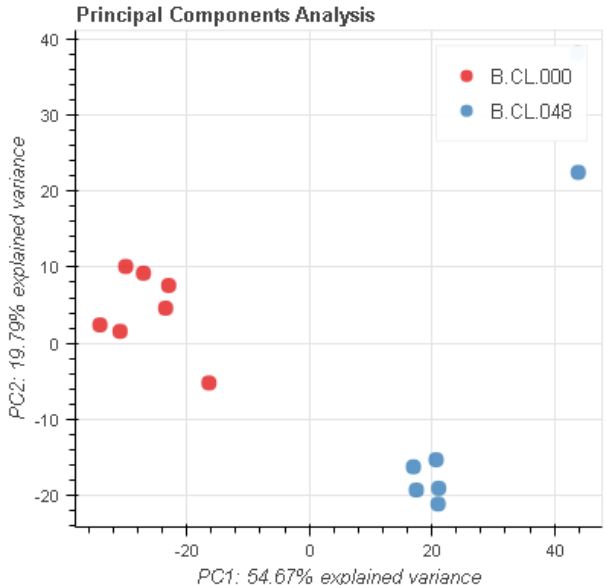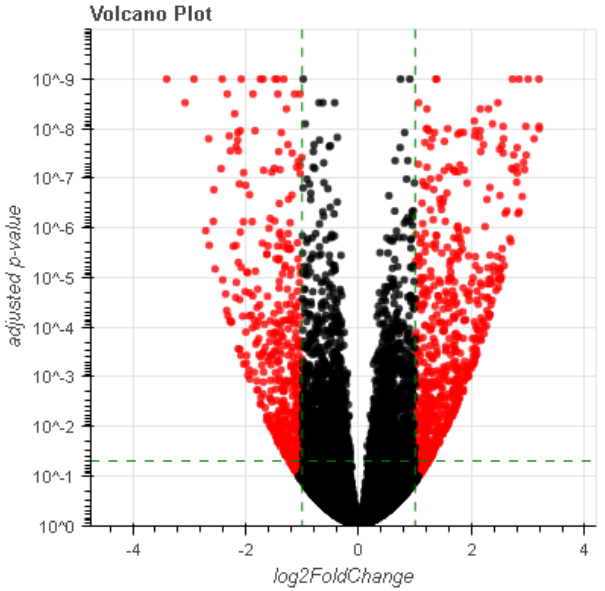

B.CL.168 V B.CL.072

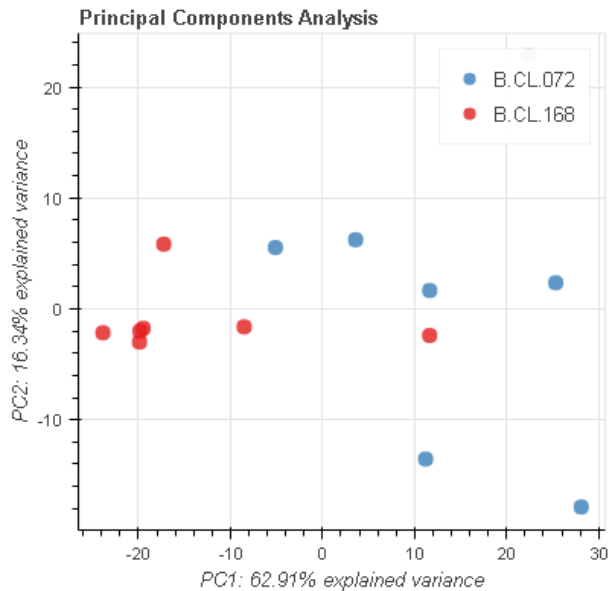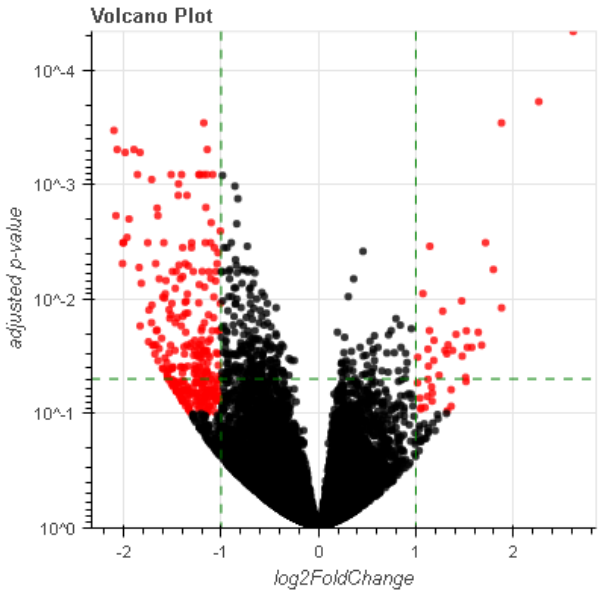

Supplementary Figure 5

**Dairy 0h v 48h**

**Dairy 72h v 168h**

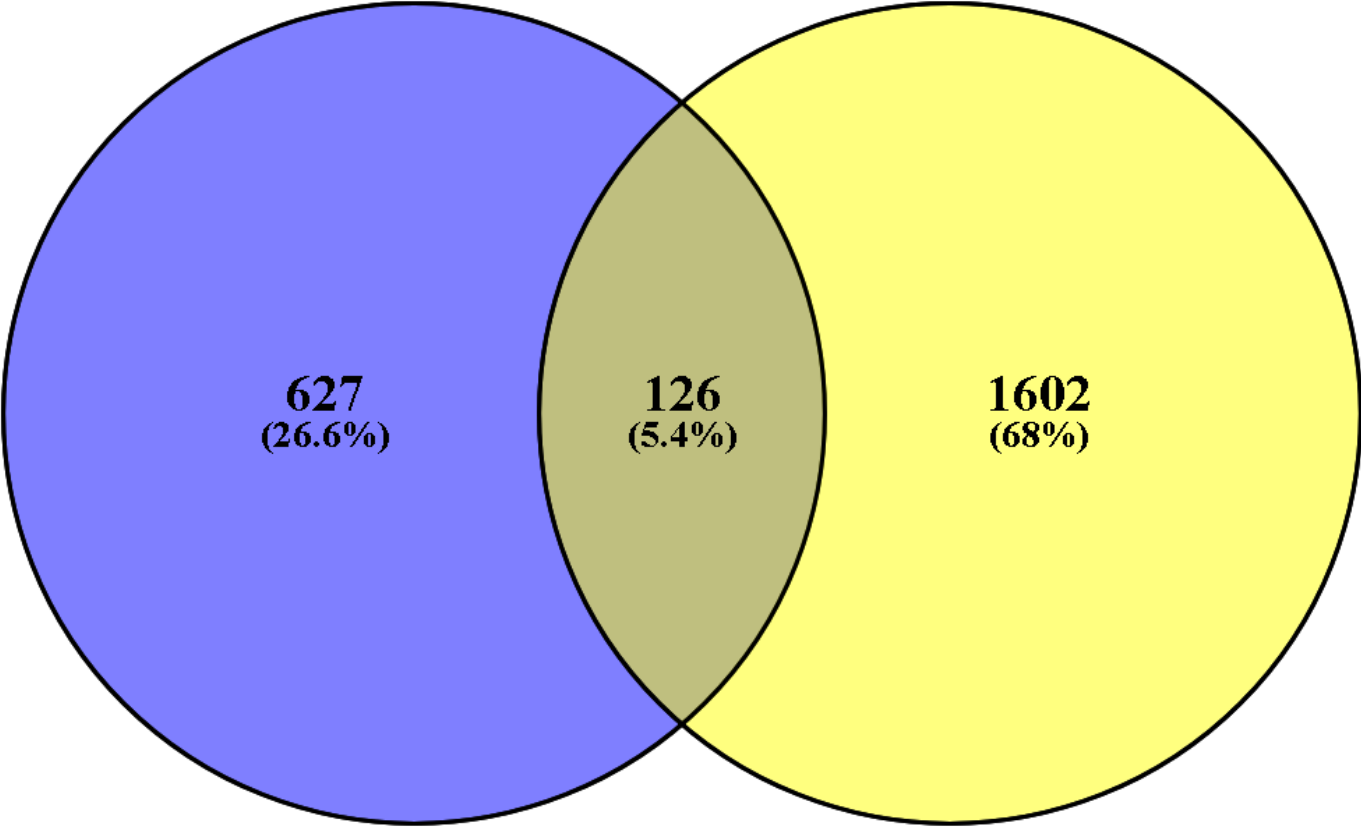

**Supplementary Figure 6**

**CL 48h v LF 48h**

**CL 72h v LF 72h**

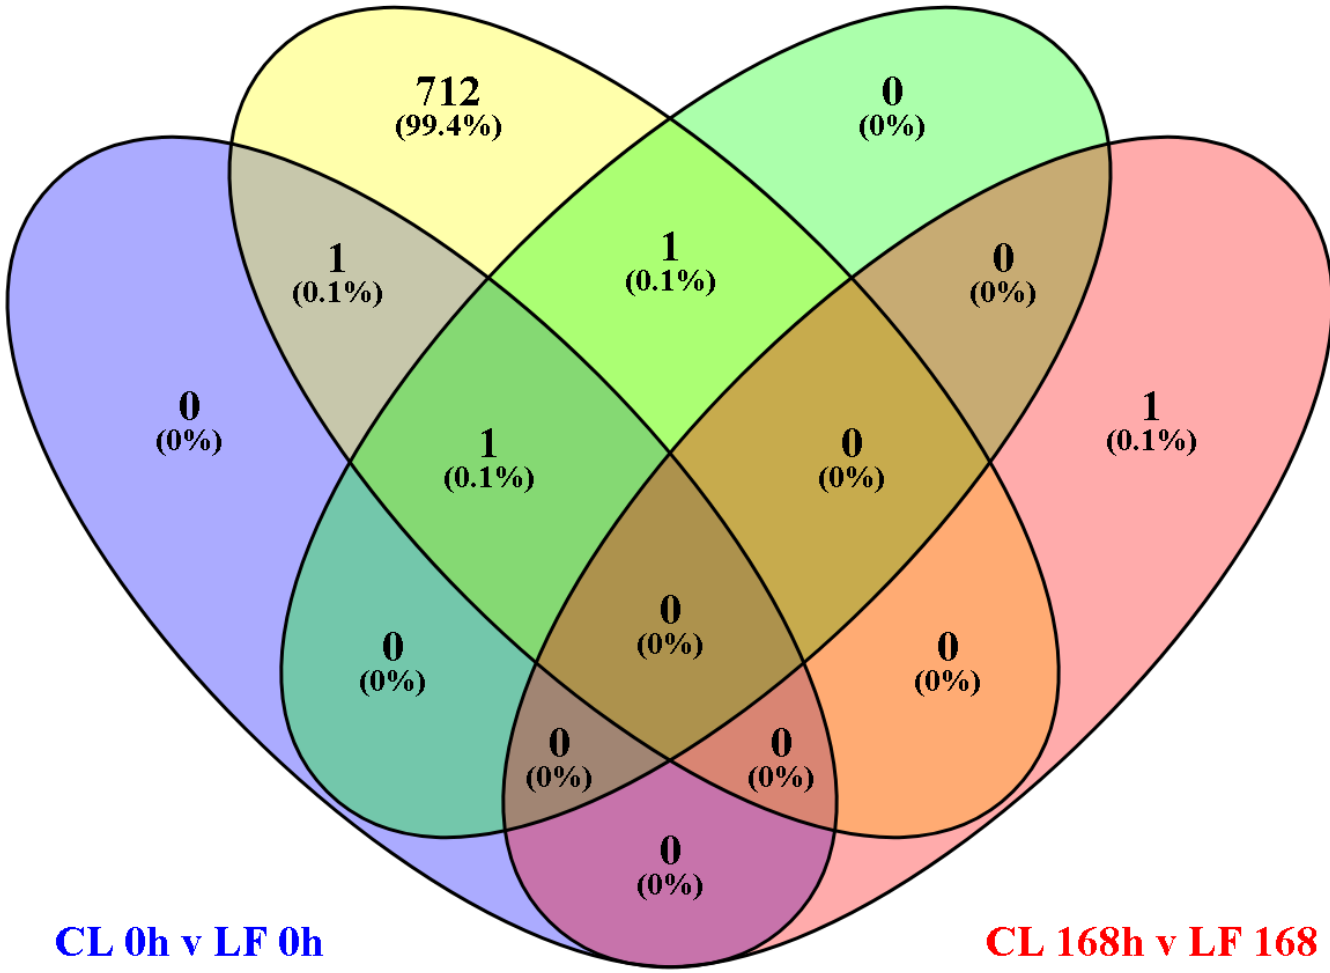

Supplementary Figure 7

**CL 0h v 48h**

**CL 72h v 168h**

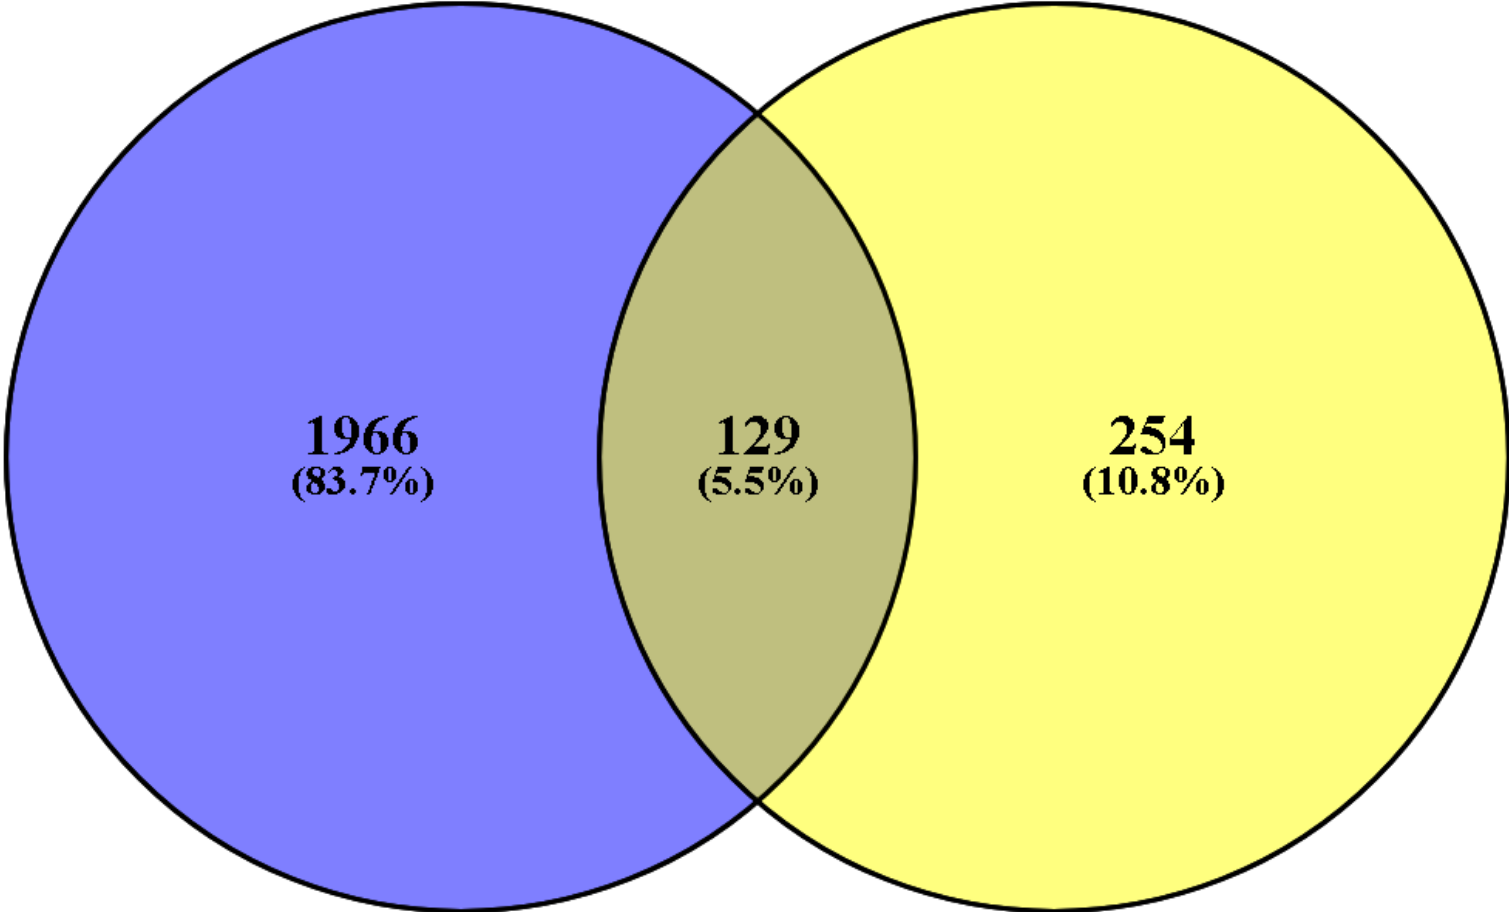



Supplementary Figure 8

**LF 0h v 48h**

**LF 72h v 168h**

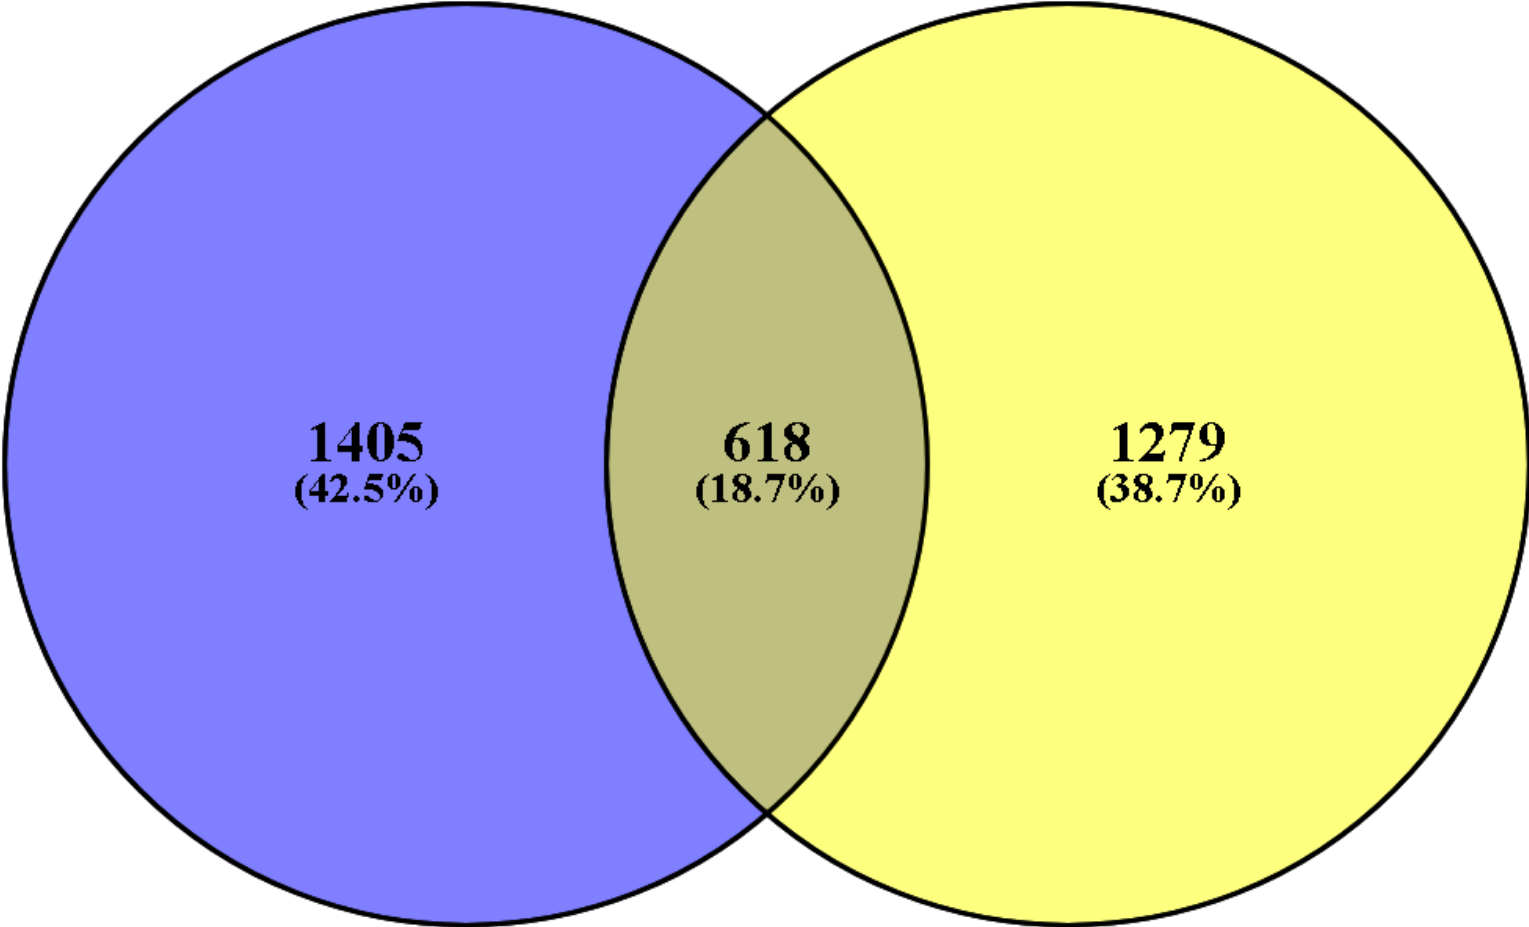

**Supplementary Figure 9**

**CL 72h v CL 168h**

**LF 0h v LF 48h**

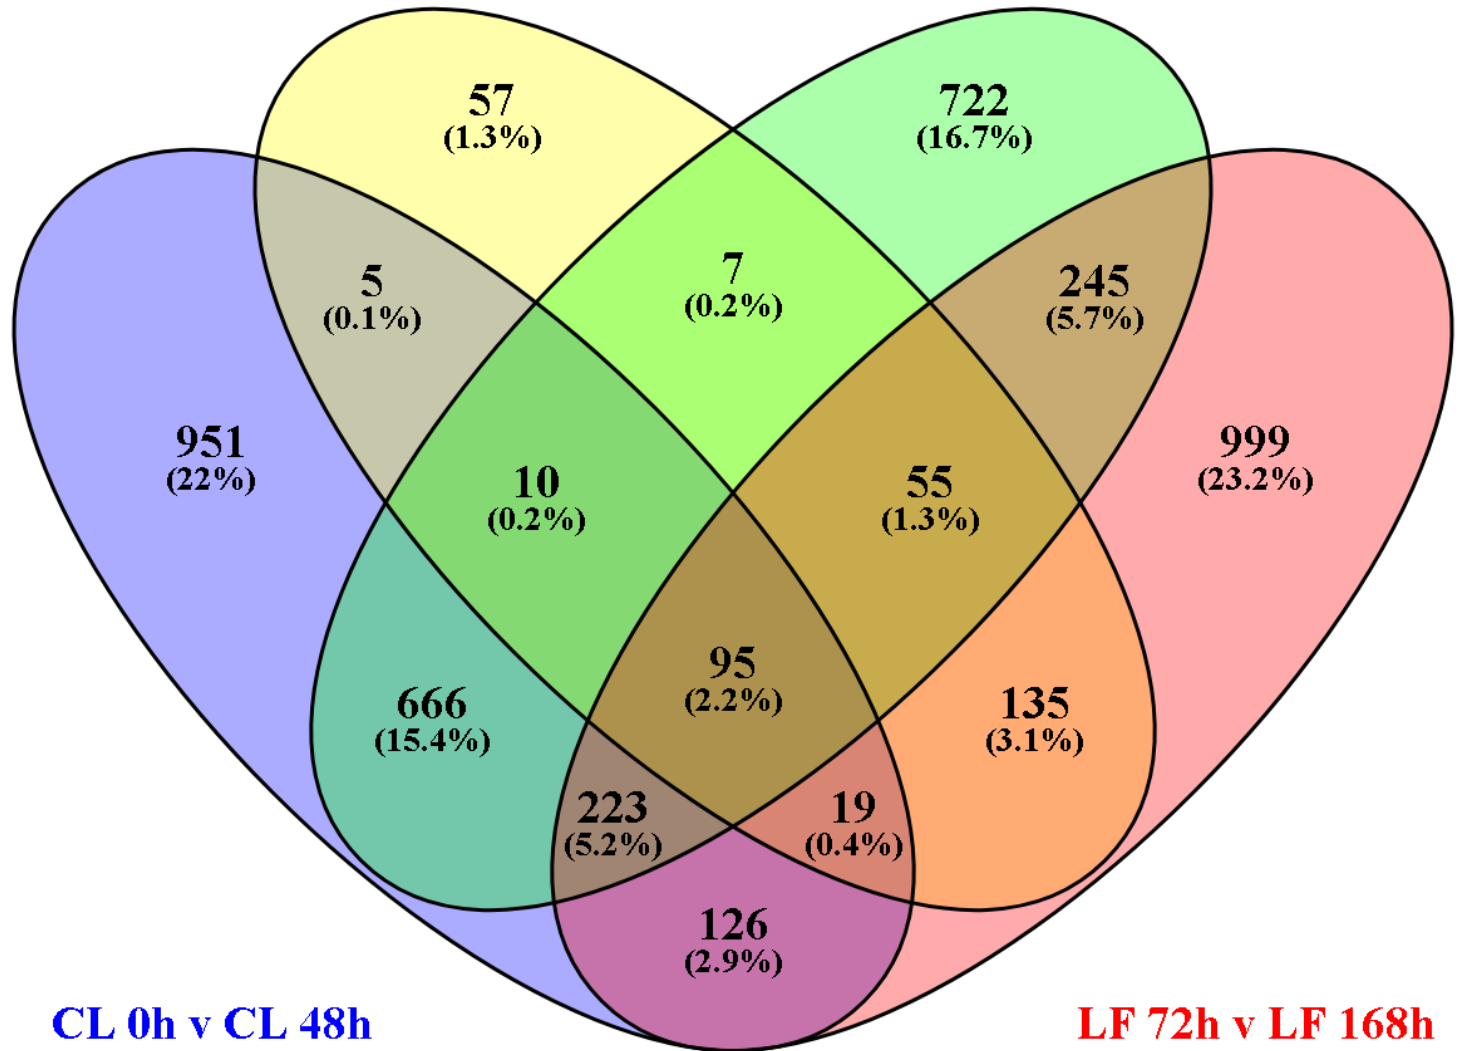

Supplementary Figure 10  
 Beef CL 48h v CL 0h  
 Fibrogenesis and transmigration of cells network regulators upregulated in 48hour

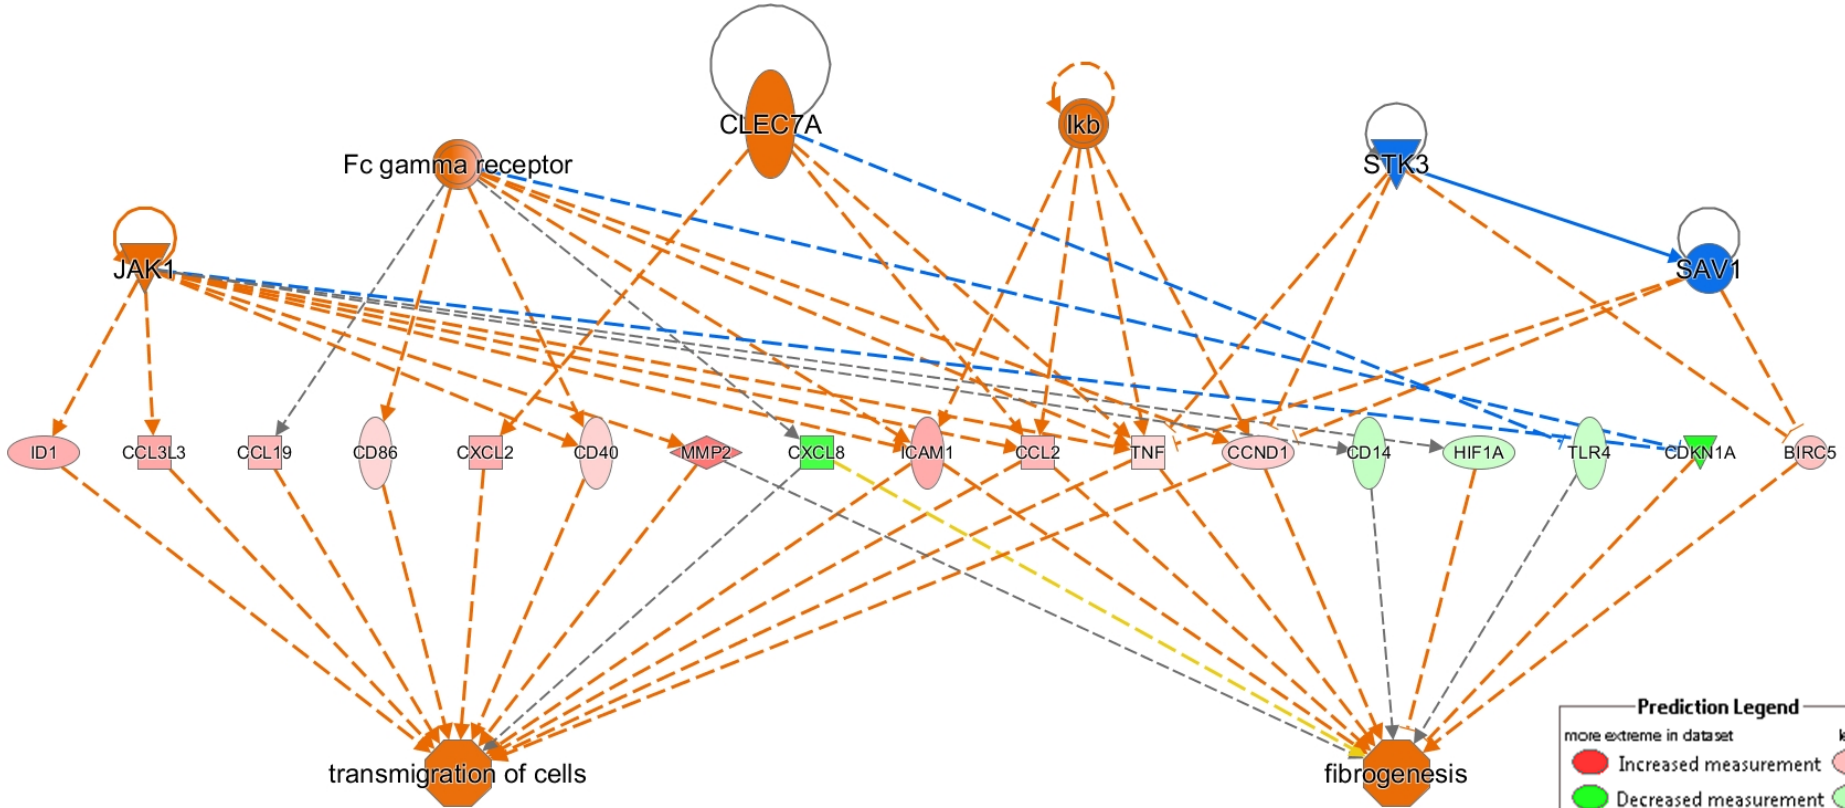

**Prediction Legend**

|                                                      |                                                         |
|------------------------------------------------------|---------------------------------------------------------|
| more extreme in dataset                              | less                                                    |
| Increased measurement (red circle)                   | Decreased measurement (green circle)                    |
| more confidence                                      | less                                                    |
| Predicted activation (orange circle)                 | Predicted inhibition (blue circle)                      |
| Glow Indicates activity when opposite of measurement |                                                         |
|                                                      | (red circle) (green circle)                             |
| Predicted Relationships                              |                                                         |
| (orange arrow)                                       | Leads to activation                                     |
| (blue arrow)                                         | Leads to inhibition                                     |
| (yellow arrow)                                       | Findings inconsistent with state of downstream molecule |
| (grey arrow)                                         | Effect not predicted                                    |







Supplementary Figure 13  
 Beef CL 48 v LF 48  
 Inhibition of CD40L in CL48- The cytokine that binds to CD40

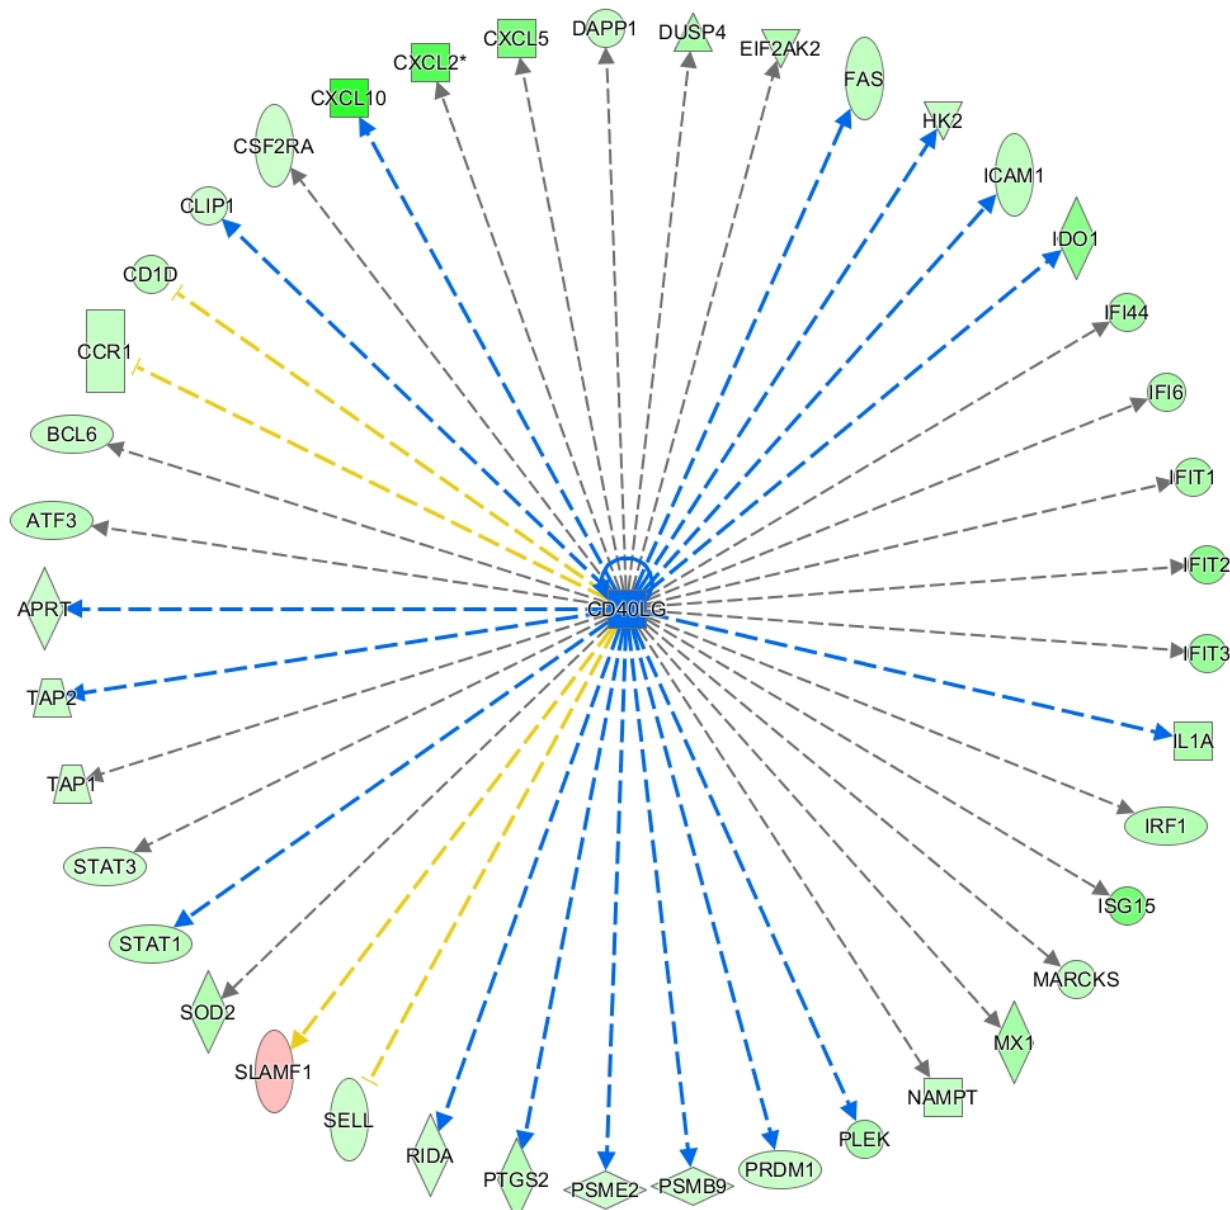

**Prediction Legend**

|                         |      |
|-------------------------|------|
| more extreme in dataset | less |
| Increased measurement   |      |
| Decreased measurement   |      |
| more confidence         | less |
| Predicted activation    |      |
| Predicted inhibition    |      |

Glow Indicates activity when opposite of measurement

|  |  |
|--|--|
|  |  |
|--|--|

**Predicted Relationships**

- Leads to activation
- Leads to inhibition
- Findings inconsistent with state of downstream molecule
- Effect not predicted

## Supplementary Table 1

Calf milk replacer and concentrate composition

DM (dry matter); CP (Crude protein)

| Chemical composition              | Calf diet     |             |       |
|-----------------------------------|---------------|-------------|-------|
|                                   | Milk replacer | Concentrate | Straw |
| Oven DM <sup>1</sup> (g/kg fresh) | 972           | 916         | 882   |
| Composition of DM (g/kg)          |               |             |       |
| Nitrogen                          | 36.6          | 29.6        | 5.7   |
| NDF <sup>2</sup>                  | -             | 347.5       | 869.3 |
| ADF <sup>3</sup>                  | -             | 175.9       | 530.5 |
| Ash                               | 75.1          | 75.4        | 47.3  |
| Ether extract                     | 201.9         | 42.4        | 13.9  |
| CP <sup>2</sup> (%)               | 22.8          | 18.5        | 3.6   |
